# Supplementary material
Source: publisher site journal article supplement (https://www.dovepress.com/article/338253)
Supplement: Supplementary file 1 [file get_supplementary_file.php]

# Supplemental Appendices

## A. Literature Search Methods

Tables S1 and S2 present the PubMed search strategies used in the review. The study selection process was performed in two phases. During level 1 screening, titles and abstracts of studies identified from the electronic databases and desktop research were double-screened by independent researchers to determine eligibility according to the inclusion and exclusion criteria shown in Tables S3 and S4. In the case of disagreement about study relevance, consensus was reached by discussing the study with a third researcher. During level 2 screening, full texts of studies selected at level 1 were obtained and double-screened by independent researchers to determine eligibility according to the inclusion and exclusion criteria. In the case of disagreement about study relevance, consensus was reached by discussing the study with a third researcher.

Table S1. PubMed literature search strategy (conducted August 11, 2020)

Limits: 2010-present; English; humans; no comments, letters, or editorials

| Search No. | Search Terms | Hits |
| --- | --- | --- |
| Disease | |  |
| #1 | “Geographic Atrophy”[Mesh] OR (“age-related macular degeneration”[Title] AND atrophic[Title]) OR ((“dry age-related macular degeneration”[Title] OR “dry macular degeneration”[Title] OR “dry AMD”[Title]) AND (advanced[Title] OR “late stage”[Title])) OR “geographic atroph*”[Title/Abstract] OR “atrophic age-related macular degeneration”[Title/Abstract] OR “atrophic AMD”[Title/Abstract] OR “advanced dry age-related macular degeneration”[Title/Abstract] OR “advanced dry AMD”[Title/Abstract] OR “late-stage dry age-related macular degeneration”[Title/Abstract] OR “late-stage dry AMD”[Title/Abstract] | 1,272 |
| **Epidemiology** | |  |
| #2 | #1 AND (“Risk Factors”[Majr] OR “Geographic Atrophy/epidemiology”[Majr] OR “Epidemiology”[Mesh] OR “Incidence”[Mesh] OR “Prevalence”[Mesh] OR “Morbidity”[Mesh] OR “risk factor*”[Title] OR prevalence[Title] OR epidemiol*[Title] OR incidence[Title] OR morbidit*[Title]) | 140 |
| Humanistic burden | |  |
| #3 | #1 AND (“Quality of Life”[Mesh] OR “Self Report”[Mesh] OR “Activities of Daily Living”[Mesh] OR “Patient Satisfaction”[Mesh] OR “Patient Preference”[Mesh] OR “Caregivers”[Mesh] OR “Automobile Driving”[Mesh] OR “Reading”[Mesh] OR “Blindness”[Mesh] OR blind*[Title] OR “visual acuity”[Title] OR “visual function*”[Title] OR burden*[Title/Abstract] OR “quality of life”[Title/Abstract] OR caregiver*[Title/Abstract] OR “care giver*”[Title/Abstract] OR carer*[Title/Abstract] OR “life quality”[Title/Abstract] OR QoL[Title/Abstract] OR hrql[Title/Abstract] OR hrqol[Title/Abstract] OR “SF-36”[Title/Abstract] OR sf36[Title/Abstract] OR “well being”[Title/Abstract] OR “functional status”[Title/Abstract] OR “activities of daily living”[Title/Abstract] OR “activity of daily living”[Title/Abstract] OR “daily living activity”[Title/Abstract] OR “daily living activities”[Title/Abstract] OR “activity of daily life”[Title/Abstract] OR “activities of daily life”[Title/Abstract] OR “daily life activity”[Title/Abstract] OR “daily life activities”[Title/Abstract] OR “physical function”[Title/Abstract] OR patient preference*[Title/Abstract] OR patient’s preference*[Title/Abstract] OR patients’ preference*[Title/Abstract] OR patient perspective*[Title/Abstract] OR patient’s perspective*[Title/Abstract] OR patients’ perspective*[Title/Abstract] OR patient experience*[Title/Abstract] OR patient’s experience*[Title/Abstract] OR patients’ experience*[Title/Abstract] OR “unmet need*”[Title/Abstract] OR “NEI-VFQ”[Title/Abstract] OR “visual function questionnaire”[Title/Abstract] OR “vision impairment profile*”[Title/Abstract] OR “EQ-5D”[Title/Abstract] OR EQ5D[Title/Abstract] OR utility[Title/Abstract] OR utilities[Title/Abstract] OR “automobile driving”[Title/Abstract] OR reading[Title/Abstract] OR “visual impairment*”[Title/Abstract] OR “vision impairment*”[Title/Abstract] OR “visually impaired”[Title/Abstract] OR “vision disabilit*”[Title/Abstract]) | 184 |
| Economic burden, including assisted living | |  |
| #4 | #1 AND (“Geographic Atrophy/economics”[Mesh] OR “Health Care Costs”[Mesh] OR “Economics”[Mesh] OR “Economics, Hospital”[Mesh] OR “Economics, Medical”[Mesh] OR “Economics, Nursing”[Mesh] OR “Economics, Pharmaceutical”[Mesh] OR “Insurance, Disability”[Mesh] OR “Health Expenditures”[Mesh] OR “Cost of Illness”[Mesh] OR “Length of Stay”[Mesh] OR “Health Resources/economics”[Mesh] OR “Fees and Charges”[Mesh] OR “Budgets”[Mesh] OR “Costs and Cost Analysis”[Mesh] OR “Cost-Benefit Analysis”[Mesh] “Quality-Adjusted Life Years”[Mesh] OR “Direct Service Costs”[Mesh] OR “Absenteeism”[Mesh] OR “Efficiency”[Mesh] OR costs[Title/Abstract] OR cost[Title/Abstract] OR costly[Title/Abstract] OR economic*[Title/Abstract] OR pharmacoeconomic*[Title/Abstract] OR fiscal[Title/Abstract] OR fee[Title/Abstract] OR fees[Title/Abstract] OR expenditure*[Title/Abstract] OR budget*[Title/Abstract] OR “disability insurance”[Title/Abstract] OR “resource utilization”[Title/Abstract] OR “resource utilisation”[Title/Abstract] OR “resource use”[Title/Abstract] OR “length of stay”[Title/Abstract] OR absenteeism[Title/Abstract] OR productiv*[Title/Abstract] OR “lost work”[Title/Abstract] OR “work loss”[Title/Abstract] OR “quality adjusted life year”[Title/Abstract] OR “quality adjusted life years”[Title/Abstract] OR QALY*[Title/Abstract] OR “Assisted Living Facilities”[Mesh] OR “assisted living”[Title/Abstract]) | 21 |
| Clinical burden, including disease progression | |  |
| #5 | #1 AND (“Disease Progression”[Majr] OR “Geographic Atrophy/complications”[Majr] OR “Comorbidity”[Majr] OR “Mortality”[Majr] OR complicat*[Title] OR sequelae[Title] OR comorbidit*[Title] OR “disease progression”[Title] OR “progression of disease”[Title] OR mortalit*[Title] OR death*[Title] OR fatal*[Title/Abstract] OR “disease aggravation*”[Title/Abstract] OR “disease flare*”[Title/Abstract] OR multimorbidit*[Title/Abstract] OR “disease exacerbation”[Title/Abstract] OR “natural history”[Title/Abstract]) | 102 |
| Treatment | |  |
| #6 | #1 AND (“Geographic Atrophy/drug therapy”[Majr] OR “Geographic Atrophy/therapy”[Majr] OR “Standard of Care”[Majr] OR “Drug Therapy”[Majr] OR “Therapeutics”[Majr] OR treat*[Title] OR therap*[Title] OR “standard of care”[Title] OR manage*[Title] OR “current treatment*”[Title/Abstract] OR “treatment option*”[Title/Abstract] OR “emerging treatment*”[Title/Abstract] OR “emerging therap*”[Title/Abstract] OR “disease management”[Title/Abstract] OR “investigational agent*”[Title/Abstract] OR “investigational treatment*”[Title/Abstract] OR “investigational therap*”[Title/Abstract] OR “best supportive care”[Title/Abstract]) | 239 |
| **Exclusions** | |  |
| #7 | “Animals”[Mesh] NOT “Humans”[Mesh] | 1,155,688 |
| #8 | “Comment”[Publication Type] OR “Letter”[Publication Type] OR “Editorial”[Publication Type] | 812,872 |
| **Total** | |  |
| #9 | (#2 OR #3 OR #4 OR #5 OR #6) NOT (#7 OR #8) | **531** |

Table S2. PubMed literature search strategy (conducted January 22, 2021)

Limits: 2005-present; English; Humans; No comments, letters, or editorials

| Search No. | | Search Terms | Hits | |
| --- | --- | --- | --- | --- |
| Disease | | |  | |
| #1 | | “Geographic Atrophy”[Mesh] OR (“age-related macular degeneration”[Title] AND atrophic[Title]) OR ((“dry age-related macular degeneration”[Title] OR “dry macular degeneration”[Title] OR “dry AMD”[Title]) AND (advanced[Title] OR “late stage”[Title])) OR “geographic atroph*”[Title/Abstract] OR “atrophic age-related macular degeneration”[Title/Abstract] OR “atrophic AMD”[Title/Abstract] OR “advanced dry age-related macular degeneration”[Title/Abstract] OR “advanced dry AMD”[Title/Abstract] OR “late-stage dry age-related macular degeneration”[Title/Abstract] OR “late-stage dry AMD”[Title/Abstract] | 1,553 | |
| Humanistic burden | | |  | |
| #2 | | #1 AND (“Quality of Life”[Mesh] OR “Self Report”[Mesh] OR “Activities of Daily Living”[Mesh] OR “Patient Satisfaction”[Mesh] OR “Patient Preference”[Mesh] OR “Caregivers”[Mesh] OR “Automobile Driving”[Mesh] OR “Reading”[Mesh] OR “Blindness”[Mesh] OR blind*[Title] OR “visual acuity”[Title] OR “visual function*”[Title] OR burden*[Title/Abstract] OR “quality of life”[Title/Abstract] OR caregiver*[Title/Abstract] OR “care giver*”[Title/Abstract] OR carer*[Title/Abstract] OR “life quality”[Title/Abstract] OR QoL[Title/Abstract] OR hrql[Title/Abstract] OR hrqol[Title/Abstract] OR “SF-36”[Title/Abstract] OR sf36[Title/Abstract] OR “well being”[Title/Abstract] OR “functional status”[Title/Abstract] OR “activities of daily living”[Title/Abstract] OR “activity of daily living”[Title/Abstract] OR “daily living activity”[Title/Abstract] OR “daily living activities”[Title/Abstract] OR “activity of daily life”[Title/Abstract] OR “activities of daily life”[Title/Abstract] OR “daily life activity”[Title/Abstract] OR “daily life activities”[Title/Abstract] OR “physical function”[Title/Abstract] OR “patient preference*”[Title/Abstract] OR “patient’s preference*”[Title/Abstract] OR “patients’ preference*”[Title/Abstract] OR “patient perspective*”[Title/Abstract] OR “patient’s perspective*”[Title/Abstract] OR “patients’ perspective*”[Title/Abstract] OR “patient experience*”[Title/Abstract] OR “patient’s experience*”[Title/Abstract] OR “patients’ experience*”[Title/Abstract] OR “unmet need*”[Title/Abstract] OR “NEI-VFQ”[Title/Abstract] OR “visual function questionnaire”[Title/Abstract] OR “vision impairment profile*”[Title/Abstract] OR “EQ-5D”[Title/Abstract] OR EQ5D[Title/Abstract] OR utility[Title/Abstract] OR utilities[Title/Abstract] OR “automobile driving”[Title/Abstract] OR reading[Title/Abstract] OR “visual impairment*”[Title/Abstract] OR “vision impairment*”[Title/Abstract] OR “visually impaired”[Title/Abstract] OR “vision disabilit*”[Title/Abstract]) | 247 | |
| Economic burden - including assisted living | | | | |
| #3 | | #1 AND (“Geographic Atrophy/economics”[Mesh] OR “Health Care Costs”[Mesh] OR “Economics”[Mesh] OR “Economics, Hospital”[Mesh] OR “Economics, Medical”[Mesh] OR “Economics, Nursing”[Mesh] OR “Economics, Pharmaceutical”[Mesh] OR “Insurance, Disability”[Mesh] OR “Health Expenditures”[Mesh] OR “Cost of Illness”[Mesh] OR “Length of Stay”[Mesh] OR “Health Resources/economics”[Mesh] OR “Fees and Charges”[Mesh] OR “Budgets”[Mesh] OR “Costs and Cost Analysis”[Mesh] OR “Cost-Benefit Analysis”[Mesh] “Quality-Adjusted Life Years”[Mesh] OR “Direct Service Costs”[Mesh] OR “Absenteeism”[Mesh] OR “Efficiency”[Mesh] OR costs[Title/Abstract] OR cost[Title/Abstract] OR costly[Title/Abstract] OR economic*[Title/Abstract] OR pharmacoeconomic*[Title/Abstract] OR fiscal[Title/Abstract] OR fee[Title/Abstract] OR fees[Title/Abstract] OR expenditure*[Title/Abstract] OR budget*[Title/Abstract] OR “disability insurance”[Title/Abstract] OR “resource utilization”[Title/Abstract] OR “resource utilisation”[Title/Abstract] OR “resource use”[Title/Abstract] OR “length of stay”[Title/Abstract] OR absenteeism[Title/Abstract] OR productiv*[Title/Abstract] OR “lost work”[Title/Abstract] OR “work loss”[Title/Abstract] OR “quality adjusted life year”[Title/Abstract] OR “quality adjusted life years”[Title/Abstract] OR QALY*[Title/Abstract] OR “Assisted Living Facilities”[Mesh] OR “assisted living”[Title/Abstract]) | 28 | |
| **Exclusions** | | | | |
| #4 | “Animals”[Mesh] NOT “Humans”[Mesh] | | 1,706,468 | |
| #5 | “Comment”[Publication Type] OR “Letter”[Publication Type] OR “Editorial”[Publication Type] | | 1,114,819 | |
| **Total** | | | | |
| #6 | (#2 OR #3) NOT (#4 OR #5) | | | **255** |

Table S3. Inclusion and exclusion criteria for level 1 and level 2 screening

| Criteria | Included | Excluded |
| --- | --- | --- |
| Disease population | - Economic and humanistic burden studies: patients with GA secondary to AMDa,b and their caregivers - All other studies: Patients with GA secondary to AMDa,b | - Patients without GA - Patients with GA secondary to a condition other than AMD, such as Stargardt disease, cone rod dystrophy, or toxic maculopathies, like Plaquenil maculopathy in either eye - Mixed populations, including patients with GA secondary to AMD, for which results are not reported separately for patients with GA secondary to AMD |
| Study type and outcomes | - Review articles or meta-analysesc - Primary studies | - Studies that describe methodology but do not provide results - No outcomes of interest |
| Language | - English | - Non-English |
| Date | - 2010-2020d | - Studies before 2010d - Studies for which newer data are available |

AMD, age-related macular degeneration; GA, geographic atrophy; SLR, systematic literature review.

a No age limit was applied to allow for inclusion of relevant studies that do not specify age of study participants; however, because of the nature of GA secondary to AMD, it was generally expected that most studies will be in patients ≥ 60 years old (the radius linear model-predicted average age of onset of GA in untreated eyes is 67.4 ± 5.2) [1](#_ENREF_1).

b Patients with GA and comorbidities, such as neovascular AMD (also referred to as wet AMD) and/or choroidal neovascularization, may have been included.

c Includes non-SLRs, SLRs, and meta-analyses.

d Key foundational articles published prior to 2010 that are identified from bibliographies of SLRs and meta-analyses published in the last 5 years that are included at level 2 were included.

Table S4. Specific Inclusion and Exclusion Criteria by Burden of Illness Topic

| Topic | Included | Excluded |
| --- | --- | --- |
| Humanistic burden | Studies describing the following:   - Measurement of general or disease-specific HRQOL in GA secondary to AMD - Symptoms and impact on HRQOL (eg, mood/depression, visual impairment) - Measurement of visual functioning - Impact of the disease on ability to perform activities of daily living - Impact of the disease on disability and function - Health state preference/utility studies - Caregiver burden | See Table S3 |
| Economic burden and health care resource utilization | Studies describing:   - Direct or indirect costs of GA secondary to AMD - Health care resource utilization, including assisted living | - Economic modeling studies (cost-effectiveness, budget impact) - See Table S3 for additional criteria |

AMD, age-related macular degeneration; GA, geographic atrophy; HRQOL, health-related quality of life.

**Note:** The reference lists of systematic reviews and meta-analyses published in the last 5 years and included after level 2 screening were used for identification of primary studies that were not captured by the database search. At level 1, we screened citations in reference lists using the inclusion and exclusion criteria above. For level 2 review, full-text articles were obtained from any references included at level 1 and were screened for eligibility against the inclusion and exclusion criteria above.

## B. Cost Conversions

Table B1. Exchange Ratesa

| **Conversion Year** | **€ to US Dollar** | **£ to US Dollar** |
| --- | --- | --- |
| 2000 | 1.083 | 0.661 |
| 2001 | 1.117 | 0.695 |
| 2002 | 1.058 | 0.667 |
| 2003 | 0.884 | 0.612 |
| 2004 | 0.804 | 0.546 |
| 2005 | 0.804 | 0.55 |
| 2006 | 0.796 | 0.543 |
| 2007 | 0.73 | 0.5 |
| 2008 | 0.68 | 0.544 |
| 2009 | 0.717 | 0.642 |
| 2010 | 0.754 | 0.647 |
| 2011 | 0.718 | 0.624 |
| 2012 | 0.778 | 0.633 |
| 2013 | 0.753 | 0.64 |
| 2014 | 0.753 | 0.608 |
| 2015 | 0.901 | 0.655 |
| 2016 | 0.903 | 0.741 |
| 2017 | 0.885 | 0.777 |
| 2018 | 0.847 | 0.75 |
| 2019 | 0.893 | 0.783 |
| 2020 | 0.876 | 0.78 |

a Taken from [OECD (2021)2](#_ENREF_2).

Table B2. US Dollar Inflationa

| **Inflation Year** | **US Dollar Inflation Factor** |
| --- | --- |
| 1997 | 67.7 |
| 1998 | 68.8 |
| 1999 | 70.3 |
| 2000 | 72.7 |
| 2001 | 74.7 |
| 2002 | 75.9 |
| 2003 | 77.6 |
| 2004 | 79.7 |
| 2005 | 82.4 |
| 2006 | 85.1 |
| 2007 | 87.5 |
| 2008 | 90.8 |
| 2009 | 90.5 |
| 2010 | 92 |
| 2011 | 94.9 |
| 2012 | 96.9 |
| 2013 | 98.3 |
| 2014 | 99.9 |
| 2015 | 100 |
| 2016 | 101.3 |
| 2017 | 103.4 |
| 2018 | 105.9 |
| 2019 | 107.9 |
| 2020 | 109.2 |

a Taken from [OECD (2021)2](#_ENREF_2).

## C. PRISMA Diagram

Figure C1. PRISMA Diagram


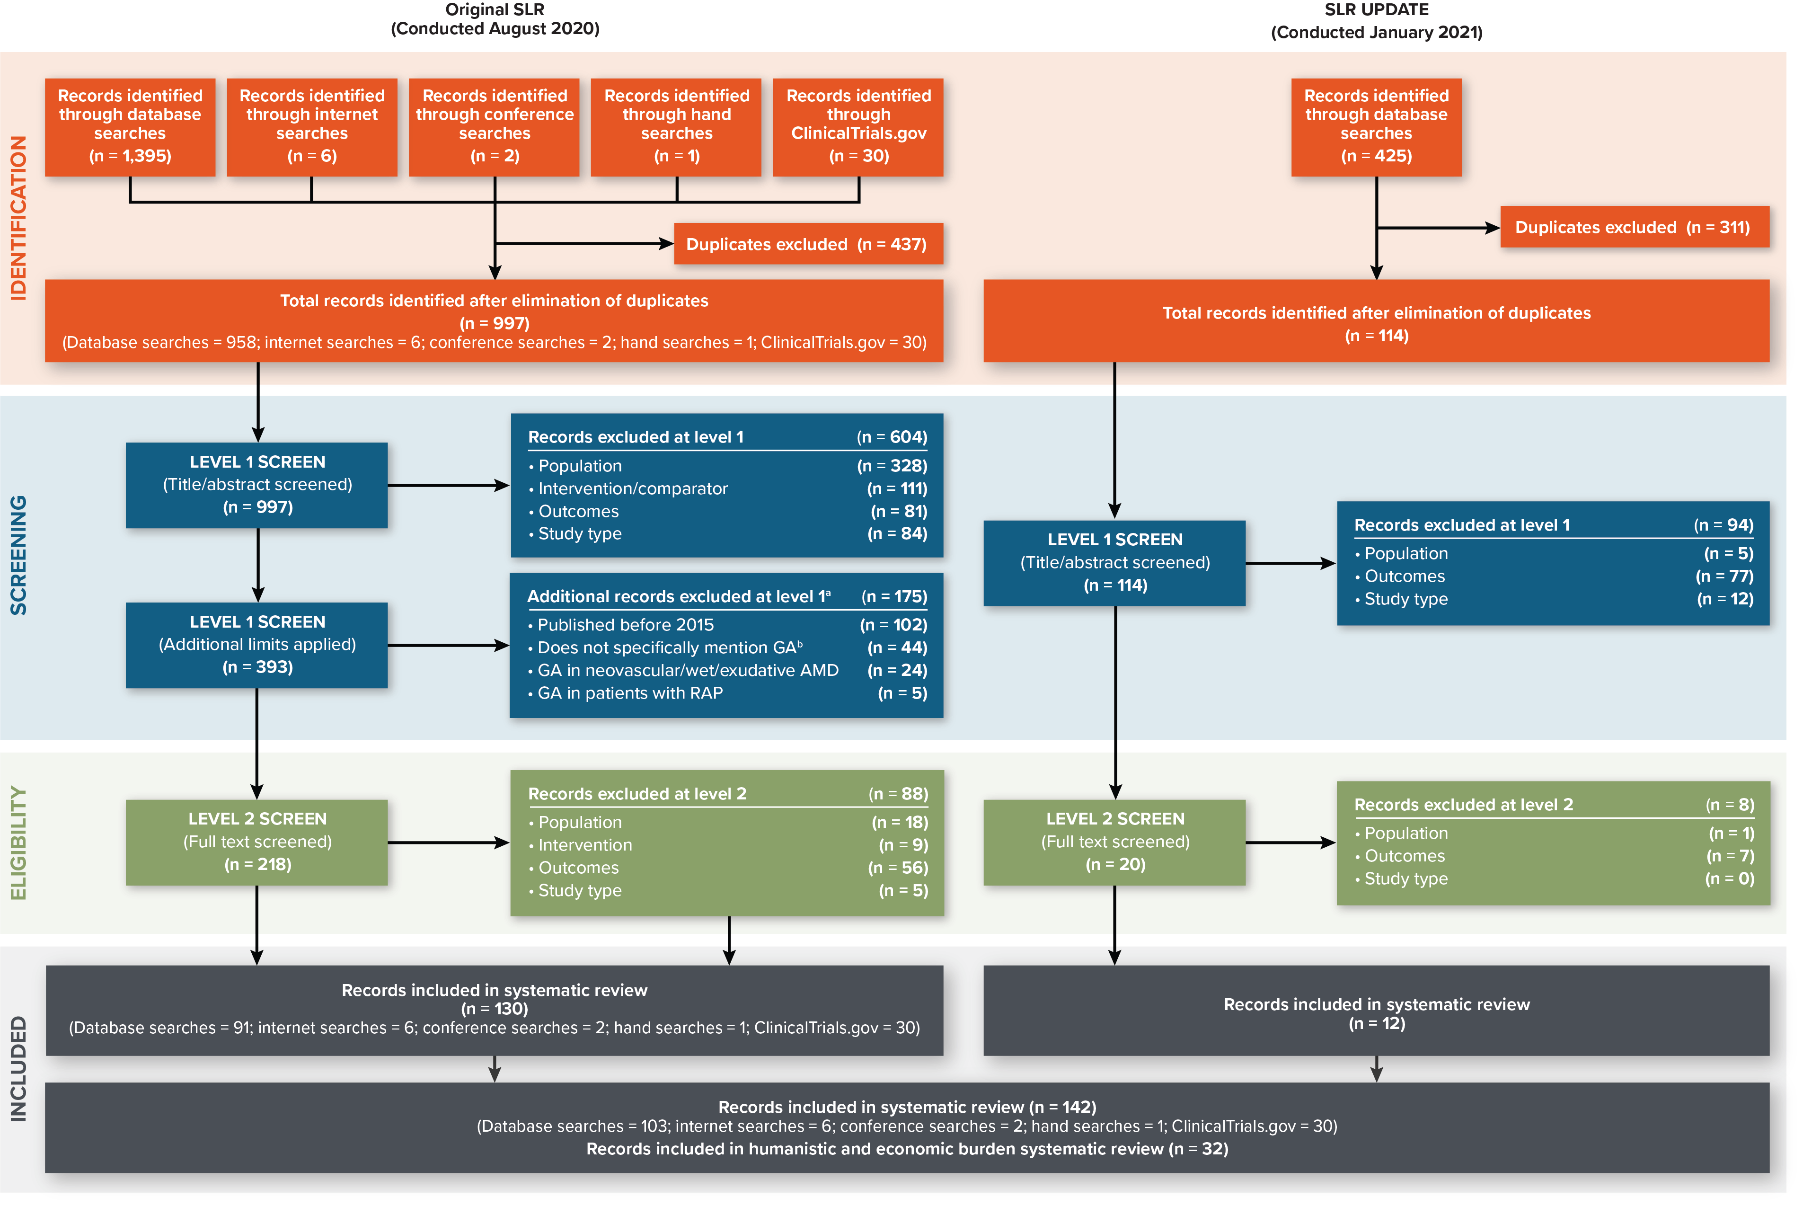


AMD, age-related macular degeneration; GA, geographic atrophy; PRISMA, Preferred Reporting Items for Systematic Reviews and Meta-Analyses; RAP, retinal angiomatous proliferation.

**Note:** The clinical burden of GA is not reported here.

a Additional exclusions post-level 1 screen based on protocol modifications.

b Studies where the condition of interest was not explicitly called “GA.” This included studies using terminology such as “advanced dry AMD,” “atrophic AMD,” and “late-stage dry AMD.”

Adapted from [Moher et al. (2009)3 53](#_ENREF_3).

## D. Health-Related Quality of Life Measures

### Vision-Specific Patient-Reported Outcome Measures of Health-Related Quality of Life

#### **25-item National Eye Institute Visual Function Questionnaire**

The 25-item National Eye Institute Visual Function Questionnaire (NEI VFQ-25) vision-specific questionnaire has been used extensively to assess health-related quality of life (HRQOL) in patients with age-related macular degeneration (AMD) and has also undergone preliminary validation for use in patients with geographic atrophy (GA). The core questionnaire includes 25 items in 11 subscales on different aspects of vision-related functioning and HRQOL plus an item on general health.[4](#_ENREF_4)

Total score ranges from 0 to 100, with a higher score representing better functioning. In neovascular AMD (nAMD), changes of 4 to 6 points (in the total composite score) have been judged to represent a clinically meaningful change, corresponding to a >15-letter change in best corrected visual acuity (BCVA).[4](#_ENREF_4)

The NEI VFQ-25 subscales are as follows[5](#_ENREF_5):

- Near activities score
- Distance activities score
- Driving
- General vision
- Mental health
- Role difficulties
- Dependency
- General health
- Social functioning
- Peripheral vision
- Color vision
- Ocular pain

Reliability and validity were tested with NEI VFQ-25 data collected from 100 patients with GA from US sites of the phase 2 Mahalo study of lampalizumab. To enhance the reliability of the subscales for near and distance activities in patients with central vision loss, six additional items were completed from the appendix of the questionnaire.[4](#_ENREF_4),[6](#_ENREF_6) Results from the validation study showed that the NEI VFQ-25 composite, near activities, and distance activities subscales demonstrated good internal consistency, reliability, test-retest reliability, convergent validity, and known-groups validity with binocular measures of visual function (eg, binocular maximum reading speed and Functional Reading Independence [FRI] Index score).[4](#_ENREF_4) The inclusion of the appendix items enhanced the psychometric properties.[6](#_ENREF_6)

#### **Visual Function Index 14**

The Visual Function Index 14 (VF-14) questionnaire was originally developed to assess the functional impairment caused by cataract,[7](#_ENREF_7) but has since undergone preliminary validation for use in patients with AMD,[8](#_ENREF_8) specifically advanced AMD,[9](#_ENREF_9) although not patients with GA. The questionnaire includes 14 functional activities, including reading, recognizing people, seeing obstacles, playing games or sports, watching television, cooking, and driving.[7](#_ENREF_7) Questions are scored on a scale of 0 (unable to do) to 4 (no difficulty) and converted to a total score of 0 to 100 in which 100 represents no difficulty in performing any of the tasks included in the instrument.[7](#_ENREF_7)

The preliminary validation study in patients with advanced AMD included 62 patients with a mean age of 76 years (range, 52-92 years); 55% of patients had a BCVA of 0.5 or better (0.3 logMAR or less) in the better eye, and 36% of patients had BCVA of 0.3 or less (greater than 0.5 logMAR) in the better eye. The VF-14 scores correlated both with BCVA and the global assessment of quality of vision scale scores, supporting the validity of the VF-14 scale in evaluating visual function in patients with advanced AMD.[9](#_ENREF_9)

#### **FRI Index**

The FRI Index is a new instrument that has been developed to assess the impact of GA on functional reading independence.[10](#_ENREF_10) The instrument consists of seven items (FRI Index) that can be summarized into a single score. The seven-item FRI Index yields two scores: the mean FRI Index and the FRI Level score. The mean score is computed by using the average of the FRI item-level scores for each of the seven questions and reflects the patient’s independence performing functional reading activities on a continuous scale. Mean FRI Index scores range from 1 to 4, with higher scores indicating greater independence. The FRI Level score assigns respondents to one of four FRI levels: level 1=unable to do, level 2=needs help some or most of the time, level 3=moderately independent, and level 4=totally independent.[10](#_ENREF_10)

The FRI Index has shown good reliability and validity in patients with GA in a study of 100 patients with GA.[10](#_ENREF_10) The instrument was included for further psychometric testing in the phase 3 and observational studies investigating lampalizumab for the treatment of GA.[10](#_ENREF_10)

The seven items included in the FRI Index are as follows[10](#_ENREF_10):

- Read written print such as books, magazines, newspapers
- Read to pay bills or write a check
- Read in order to take medicine such as reading a prescription, medicine label, or syringe
- Read labels such as price tags, clothing labels, or food labels
- Read numbers on a phone, answering machine, or caller-ID device
- Read words or numbers on screen while watching television
- Read when using a computer

## Appendix References

1. Shen L, Liu F, Grossetta Nardini H, Del Priore LV. Natural history of geographic atrophy in untreated eyes with nonexudative age-related macular degeneration: a systematic review and meta-analysis. Ophthalmol Retina. 2018 Sep;2(9):914-21.

2. OECD. Organization of Economic Co-Operation and Development. 2021. Available at: <https://www.oecd.org/>. Accessed November 15, 2021.

3. Moher D, Liberati A, Tetzlaff J, Altman DG. Preferred reporting items for systematic reviews and meta-analyses: the PRISMA statement. PLoS Med. 2009 Jul 21;6(7):e1000097.

4. Sivaprasad S, Tschosik E, Kapre A, Varma R, Bressler NM, Kimel M, et al. Reliability and construct validity of the NEI VFQ-25 in a subset of patients with geographic atrophy from the phase 2 Mahalo Study. Am J Ophthalmol. 2018 Jun;190:1-8.

5. Burguera-Giménez N, García-Lázaro S, España-Gregori E, Gallego-Pinazo R, Burguera-Giménez N, Rodríguez-Vallejo M, et al. Multimodal evaluation of visual function in geographic atrophy versus normal eyes. Clin Ophthalmol. 2020;14:1533-45.

6. Kapre AW, Tschosik E, Kimel M, Chabi A, Dolan C, Sivaprasad S, et al. Reliability and convergent validity of the NEI VFQ-25 with and without near and distance activity appendix items in patients with geographic atrophy (GA) secondary to age related macular degeneration (AMD). Value Health. 2016;19(7):A572.

7. Steinberg EP, Tielsch JM, Schein OD, Javitt JC, Sharkey P, Cassard SD, et al. The VF-14. An index of functional impairment in patients with cataract. Arch Ophthalmol. 1994 May;112(5):630-8.

8. Mackenzie PJ, Chang TS, Scott IU, Linder M, Hay D, Feuer WJ, et al. Assessment of vision-related function in patients with age-related macular degeneration. Ophthalmology. 2002 Apr;109(4):720-9.

9. Riusala A, Sarna S, Immonen I. Visual function index (VF-14) in exudative age-related macular degeneration of long duration. Am J Ophthalmol. 2003 Feb;135(2):206-12.

10. Kimel M, Leidy NK, Tschosik E, Dolan C, Souied EH, Varma R, et al. Functional Reading Independence (FRI) Index: a new patient-reported outcome measure for patients with geographic atrophy. Invest Ophthalmol Vis Sci. 2016 Nov;57(14):6298-304.
